## Correction: *MYC* amplifications in myeloma cell lines: correlation with *MYC*-inhibitor efficacy

Toril Holien<sup>1</sup>, Kristine Misund<sup>1</sup>, Oddrun Elise Olsen<sup>1</sup>, Katarzyna Anna Baranowska<sup>1</sup>, Glenn Buene<sup>1</sup>, Magne Børset<sup>1,2</sup>, Anders Waage<sup>1,3</sup> and Anders Sundan<sup>1,4</sup>

<sup>1</sup> K.G. Jebsen Center for Myeloma Research, Department of Cancer Research and Molecular Medicine, Norwegian University of Science and Technology, Trondheim, Norway

<sup>2</sup> Department of Immunology and Transfusion Medicine, St. Olav's University Hospital, Trondheim, Norway

<sup>3</sup> Department of Hematology, St. Olav's University Hospital, Trondheim, Norway

<sup>4</sup> CEMIR (Centre of Molecular Inflammation Research), Department of Cancer Research and Molecular Medicine, Norwegian University of Science and Technology, Trondheim, Norway

**Published:** November 13, 2018

**Copyright:** Holien et al. This is an open-access article distributed under the terms of the Creative Commons Attribution License 3.0 (CC BY 3.0), which permits unrestricted use, distribution, and reproduction in any medium, provided the original author and source are credited.

**This article has been corrected:** The legends for figures 1 and 2 were accidentally switched. The corrected figure legends are given below:

**Figure 1: Expression of *MYC* in myeloma cell lines correlated positively with sensitivity to *MYC* inhibition.** The IC50-values of the *MYC* inhibitor 10058-F4 calculated from the results shown in Supplementary Figure 2 was compared with **A.** *MYC* mRNA values or **B.** *MYC*/GAPDH relative protein levels. The slope and R<sup>2</sup>-values are shown in the plots.

**Figure 2: *MYC* gene copy numbers determine expression of *MYC* mRNA and protein in myeloma cell lines.** In a panel of myeloma cell lines the levels of *MYC* gene copy numbers as measured by PCR was related to **A.** *MYC* mRNA measured using nCounter, and **B.** *MYC* protein levels measured using immunoblotting and normalized to GAPDH. The slope and R<sup>2</sup>-values are shown in the plots.

Original article: Oncotarget. 2015; 6:22698-22705. <https://doi.org/10.18632/oncotarget.4245>
